# Supplementary material for: Xenoline-polarized macrophages as a physiologically relevant in vitro model of tumor- associated macrophages in glioblastoma
Source: Research Square preprint supplement (doi:10.21203/rs.3.rs-6567445/v1), 2025-05-09
Supplement: Supplementary file 1 [file 8771a359e42ed2f5ed2b1e99.docx]

**Supplementary Methods**

**NLS-mCherry expressing PDX line production**

The lentiviral vector used to overexpress NLS-mCherry in JX39P in our study, pLV [Exp]-Puro-CMV+intron>NLS_mCherry, was constructed and packaged by VectorBuilder. The vector ID is VB220505-1251vxc, which can be used to retrieve detailed information about the vector on vectorbuilder.com. Virus was prepared and cells were infected as described in the main methods section.

**THP-1 monocyte cell culture.**

THP-1 cells were maintained in serum-free X-VIVO 15.

**THP-1 digital PCR**

500k THP-1 monocytes were plated and differentiated to macrophages in a 6-well plate. Afterwards, they were either maintained as resting or polarized towards an M1, M2, or 14T-TAM-like phenotype as previously described. RNA was extracted using a Qiagen RNEasy mini kit (#74104, Qiagen, Netherlands). One milligram of RNA was reverse transcribed into cDNA using M-MLV Reverse Transcriptase (#M1701, Promega, USA) and then brought up to a total volume of 100µL. IL-1β (Assay ID: Hs01555410_m1), TNFα (Assay ID: Hs00174128_m1), and IL-10 (Assay ID: Hs00961622_m1) primers were conjugated to FAM dye and GAPDH (Assay ID: Hs00266705_g1) (ThermoFisher, USA) primers were conjugated to VIC dye. Digital PCR reactions consisted of 12 µL reaction mixture per well containing 3 µL of 4x Probe PCR master mix (#250102, Qiagen, Netherlands), 1.2 µL of 10x target primer conjugated to FAM, 1.2 µL of 10x GAPDH primer conjugated to VIC, 4 uL of 1:80 diluted cDNA, and 2.6 µL of PCR-grade water. Assembled reactions were transferred to QIAcuity 8.5k 96-well Nanoplates (#250021, Qiagen, Netherlands) for partitioning using the standard priming protocol. dPCR was conducted in 40 cycles of 95oC denaturation for 15 seconds and 60oC annealing and elongation for 30 seconds. Partitions were imaged with 500 millisecond exposure time and with gain set to 6 for both target channels. Raw counts were normalized to GAPDH.

**Matrigel Coating Protocol**

96 well plates (#353219, Corning, USA) or FluoroBlok transwell inserts (#351152, Corning, USA) were coated with 200-300 µg/mL of Matrigel in 0.7% NaCl solution with 0.05M Tris at pH 8 and incubated at 37oC for 30 minutes. Afterwards, the solution was aspirated and washed one time with PBS.

**Transwell Invasion Assay**

1x105 NLS-EGFP labeled PDX cells were plated in the upper well of a Matrigel-coated fluoroblok transwell insert in 300 µL of PDX media. 100 µL of conditioned media or fresh media was added to the upper well. The lower well contained 630 µL of fresh PDX media. At the start of the assay, 70 µL of FBS was added to the lower well. Images were taken at baseline and every 6 hours for 72 hours using a Cytation 5 imager. The number of GBM cells that migrated through the membrane were analyzed using Gen5 software. Experiments were performed in technical quadruplicate using three separate biological donors. Statistical analysis was performed using a one-way ANOVA (n=4 per group).

**PDX RT-sensitivity Assay**

2000 PDX cells were seeded in a Geltex (#A1569601, ThermoFisher, USA)-coated 96 well plate and allowed to rest for 24 hours. Afterwards, they were irradiated with 0, 3, or 5 Gy radiation. CellTiter-Glo 2.0 (Promega Cat: G9241) assay was performed 5 days later according to manufacturer protocol. Results were normalized to the 0Gy condition. Statistical analysis was performed using a two-way ANOVA (n = 3-4 per group).

**S Fig. Legends**


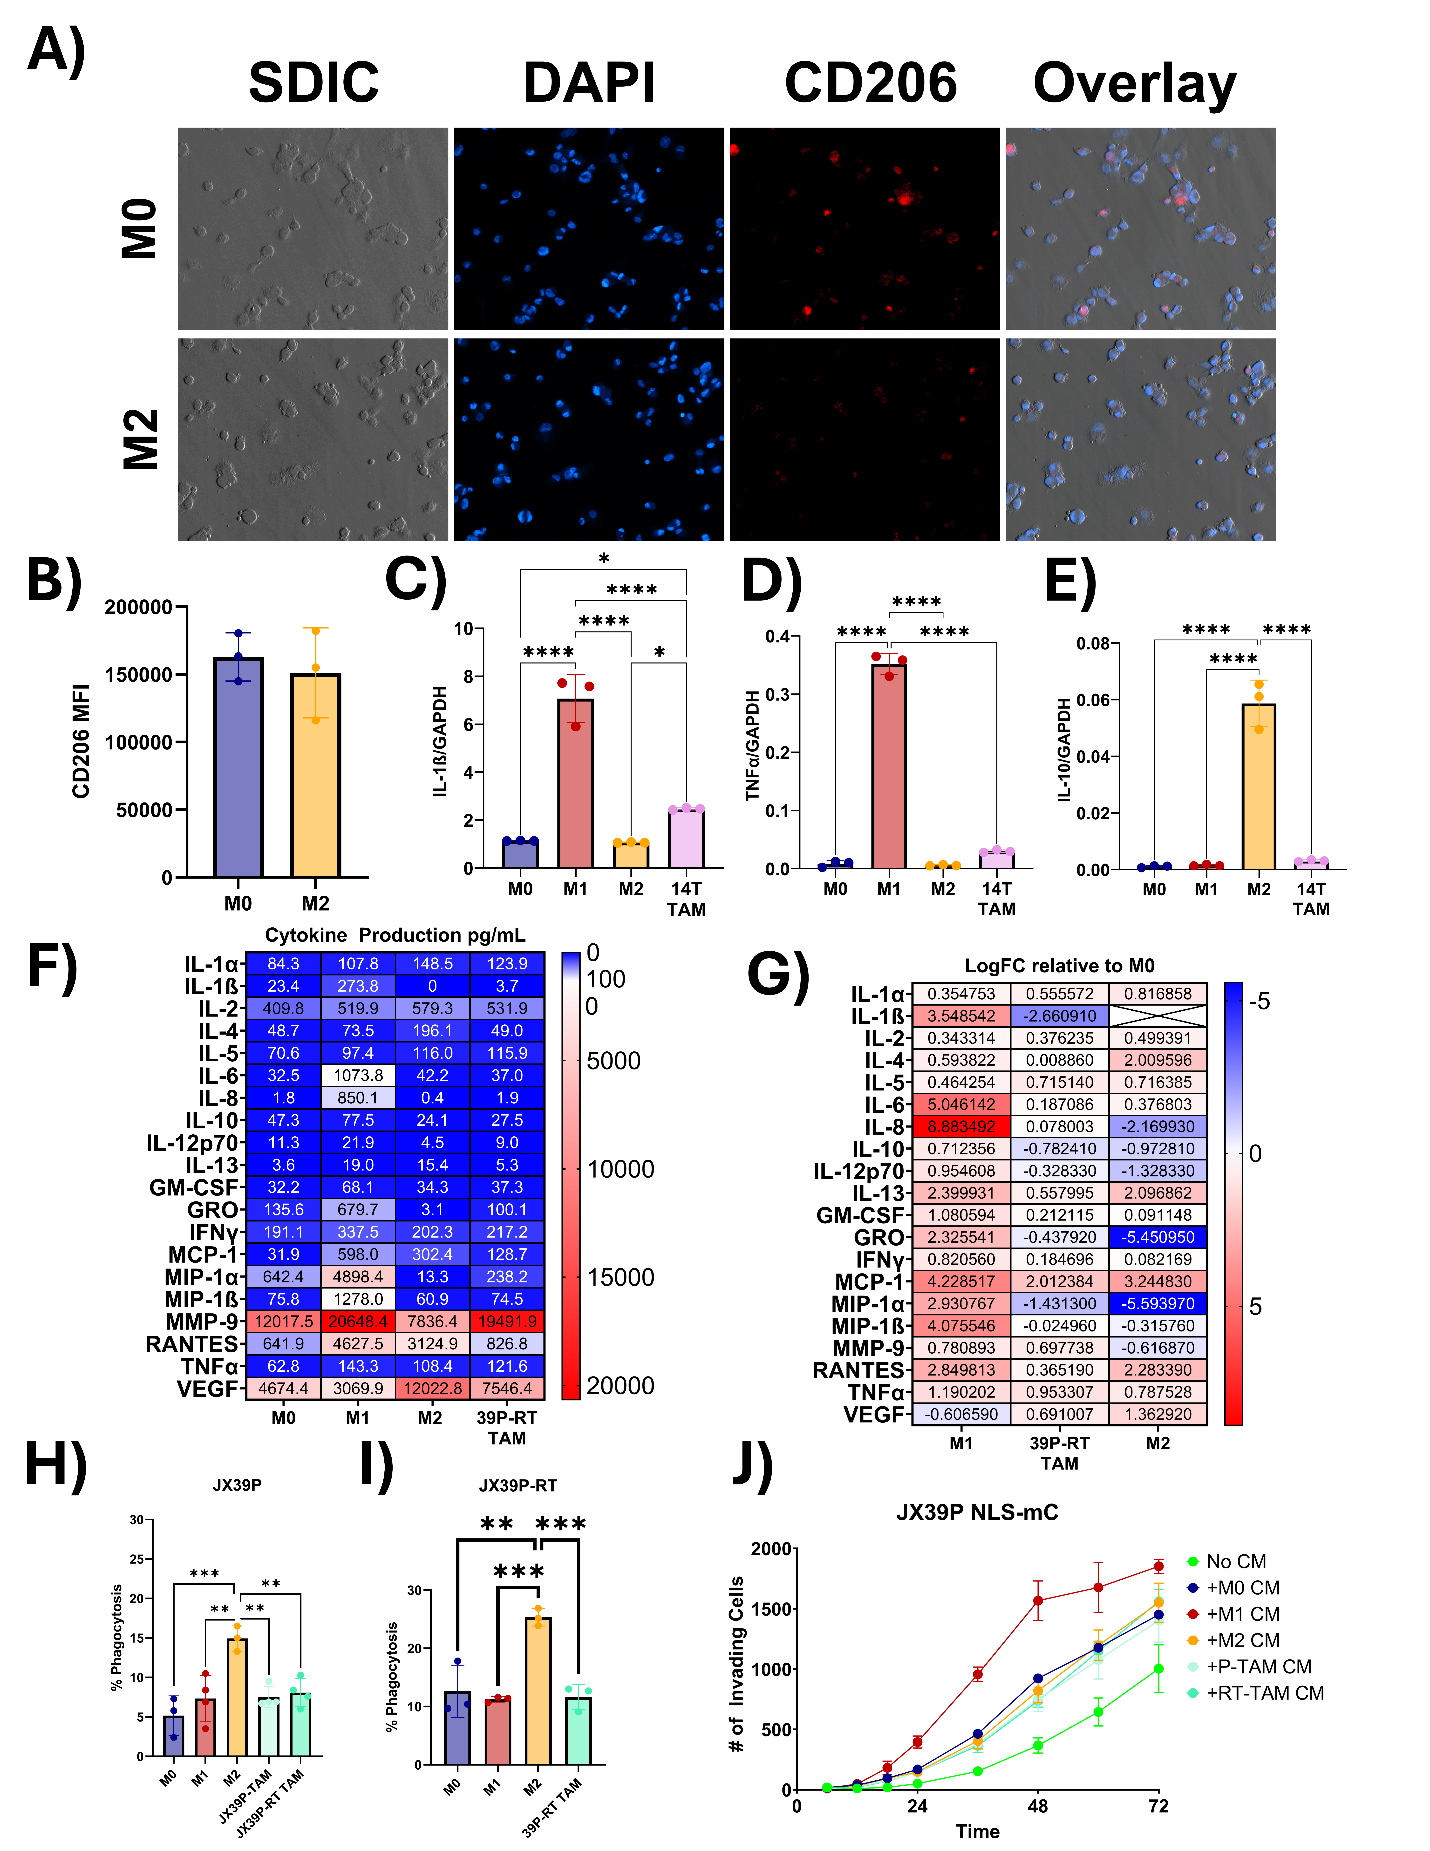


**S Fig. 1: THP-1-derived M2 macrophages fail to fully mimic canonical M2 phenotypes. (A)** Representative images of THP-1 macrophages stained for CD206 following stimulation with or without IL-4/IL-13. **(B)** Quantification of MFI of CD206. **(C-E)** GAPDH-normalized expression of IL-1β, TNFα, and IL-10 assessed through dPCR. **(F)** Heatmap showing the absolute concentrations (pg/mL) of 20 cytokines produced by THP-1 macrophages polarized to M0, M1, M2, and 39P-RT TAM states. **(G)** Heatmap showing the log-fold change of the 20 cytokines produced by M1, M2, and JX39P-RT macrophages relative to M0. **(H-I)** Percent phagocytosis of THP-1 macrophages polarized to various states against 39P and 39P-RT. **(J)** Number of invading NLS-mC labeled 39P cells. Data are displayed as Mean ± SD. * *P<*0.05, ** *P<*0.01, *** *P<*0.001, **** *P<*0.0001
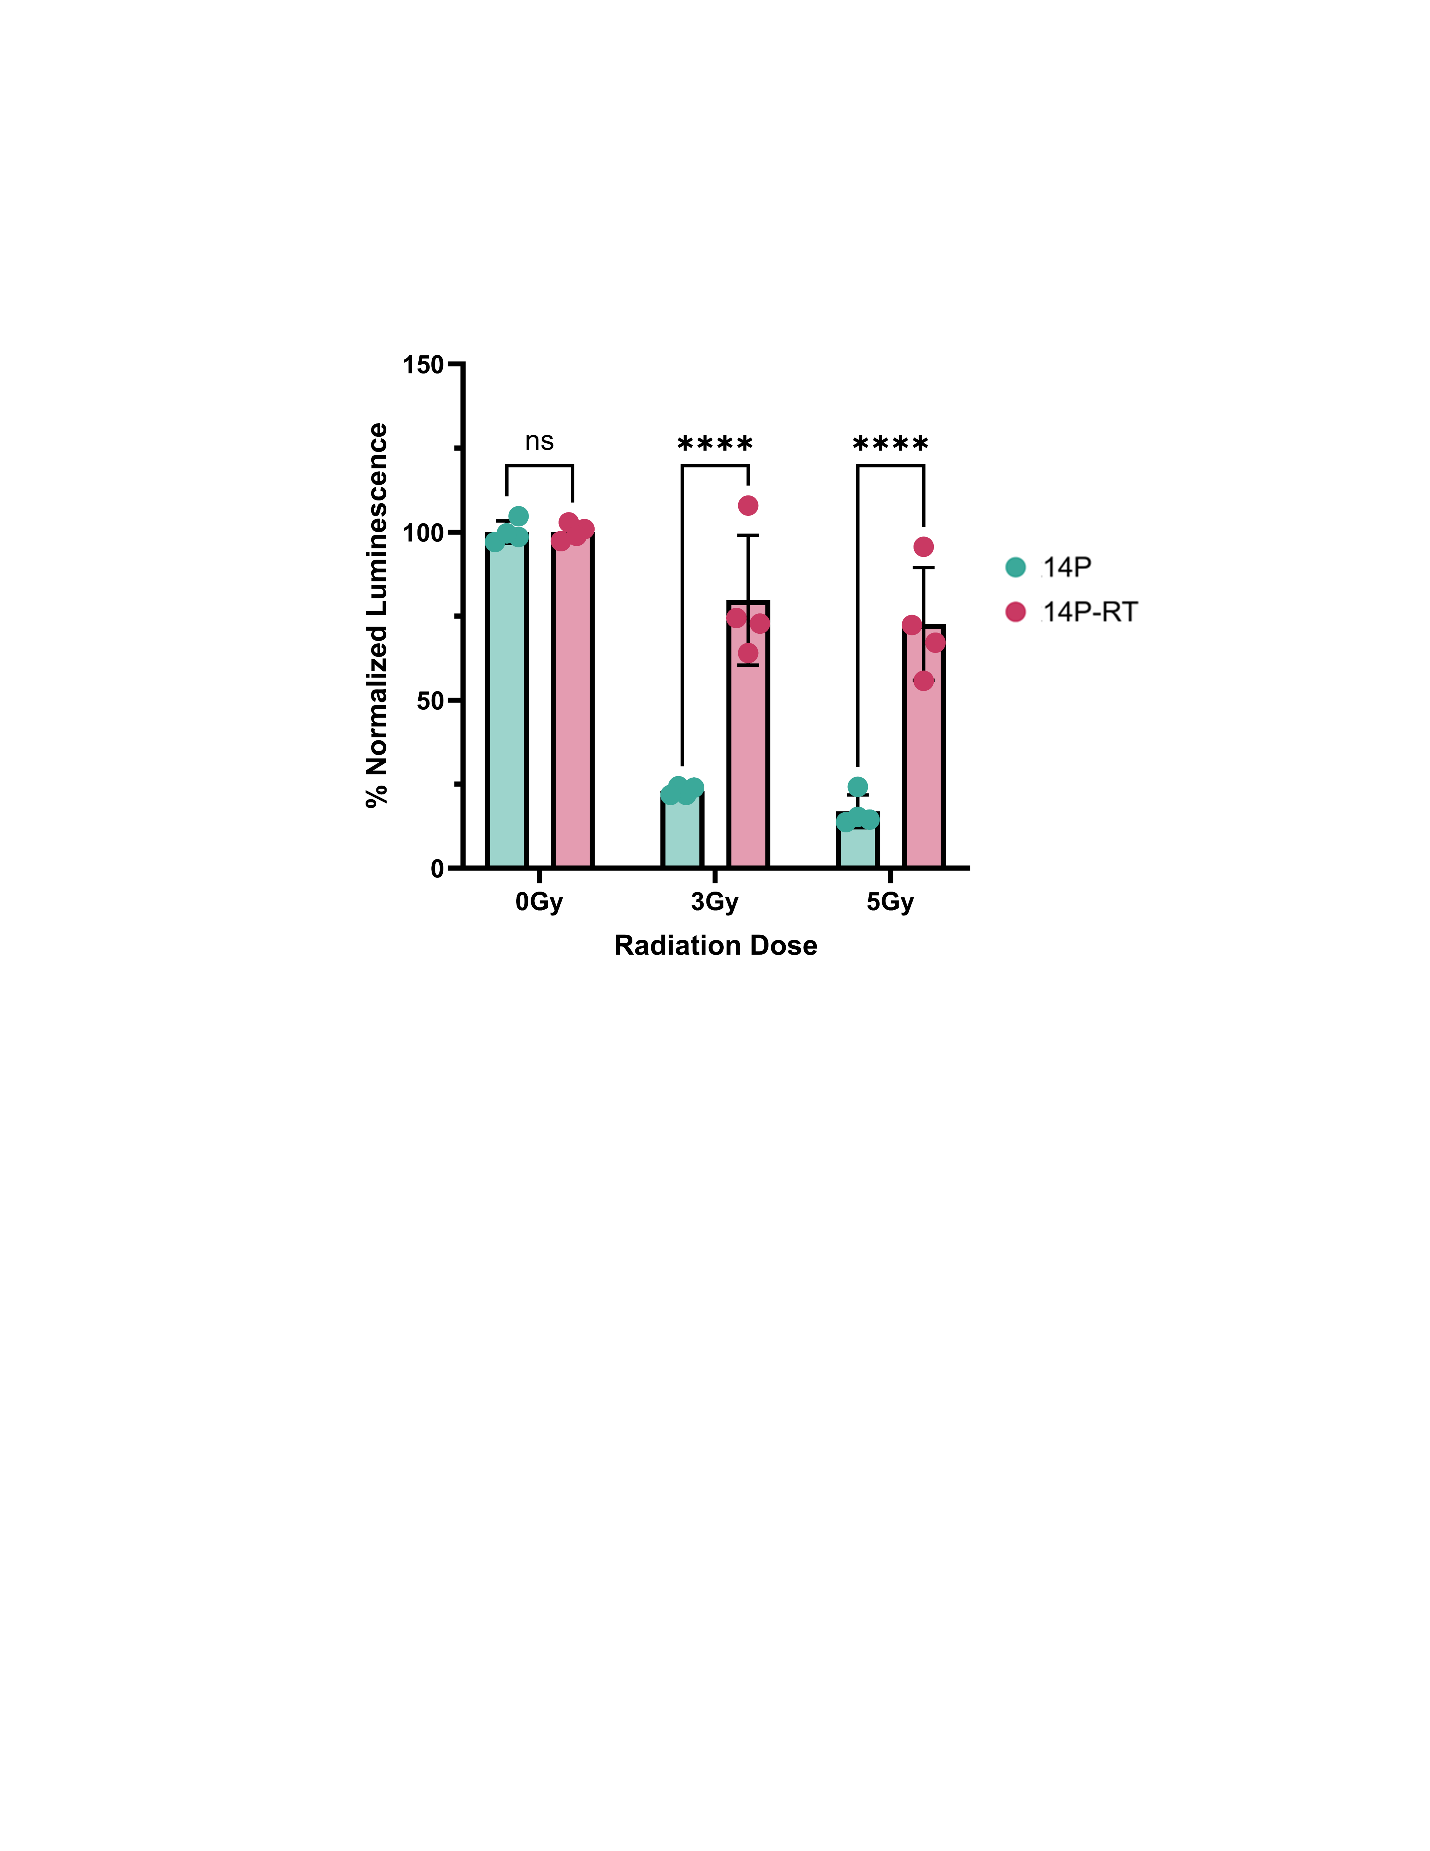


**S Fig. 2: 14P-RT maintains its radiation resistant phenotype in vitro.** Relative viability of 14P and 14P-RT cells measured 5 days after radiation. Data are displayed as Mean ± SD. **** indicates *P*<0.0001 while ns indicates non-significant.


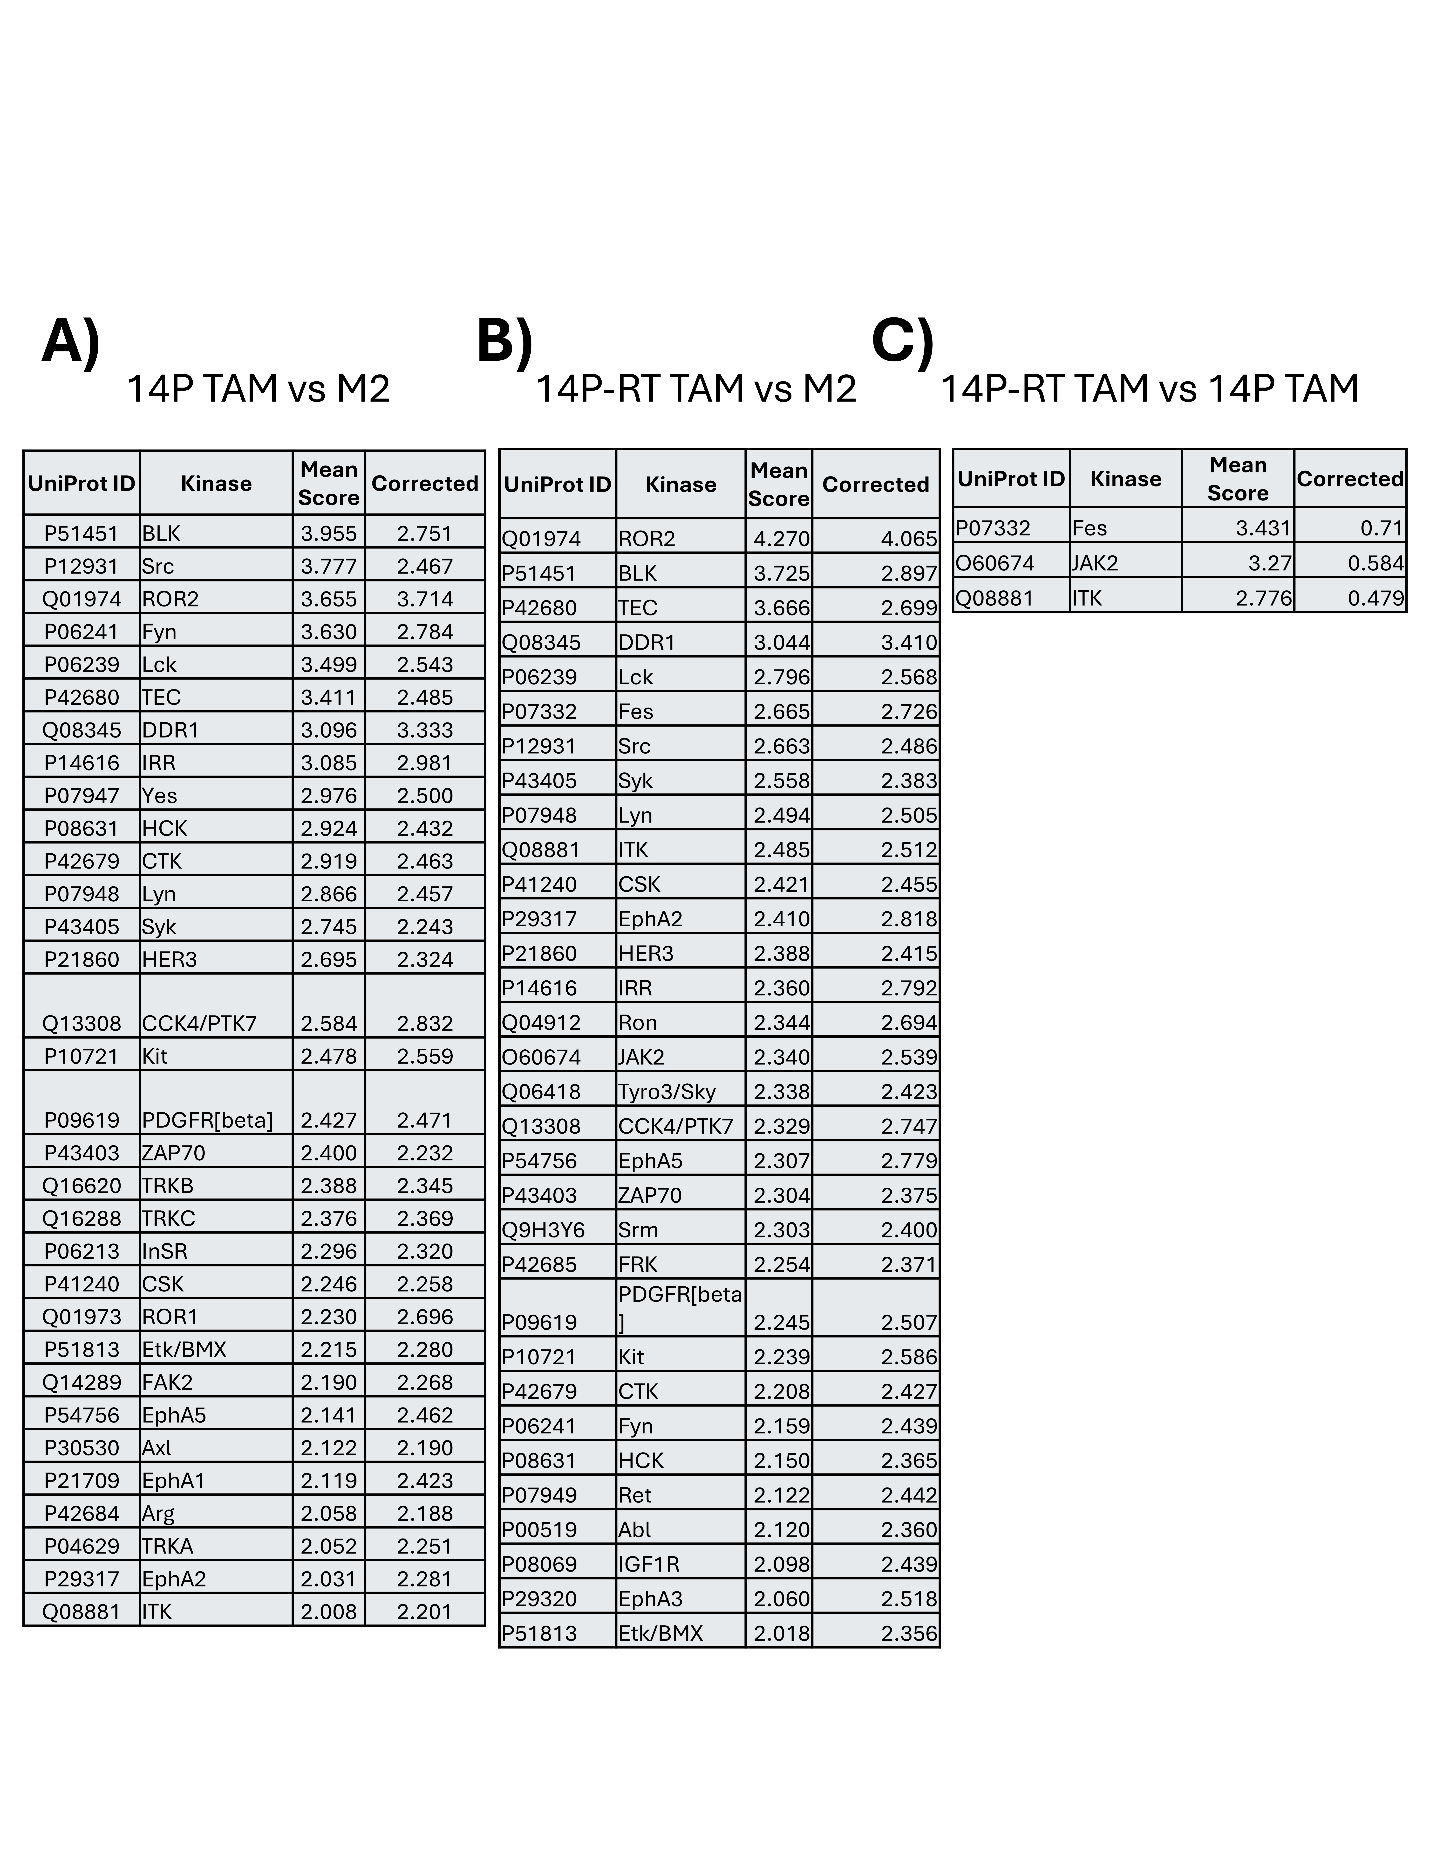


**S Fig. 3: Differential Kinases are enriched in different polarization states. (A)** Kinase activity enriched in 14P TAMs relative to M2 macrophages. **(B)** Kinase activity enriched in 14P-RT TAMs relative to M2 macrophages. **(C)** Kinase activity enriched in 14P-RT TAMs relative to 14P TAMs.


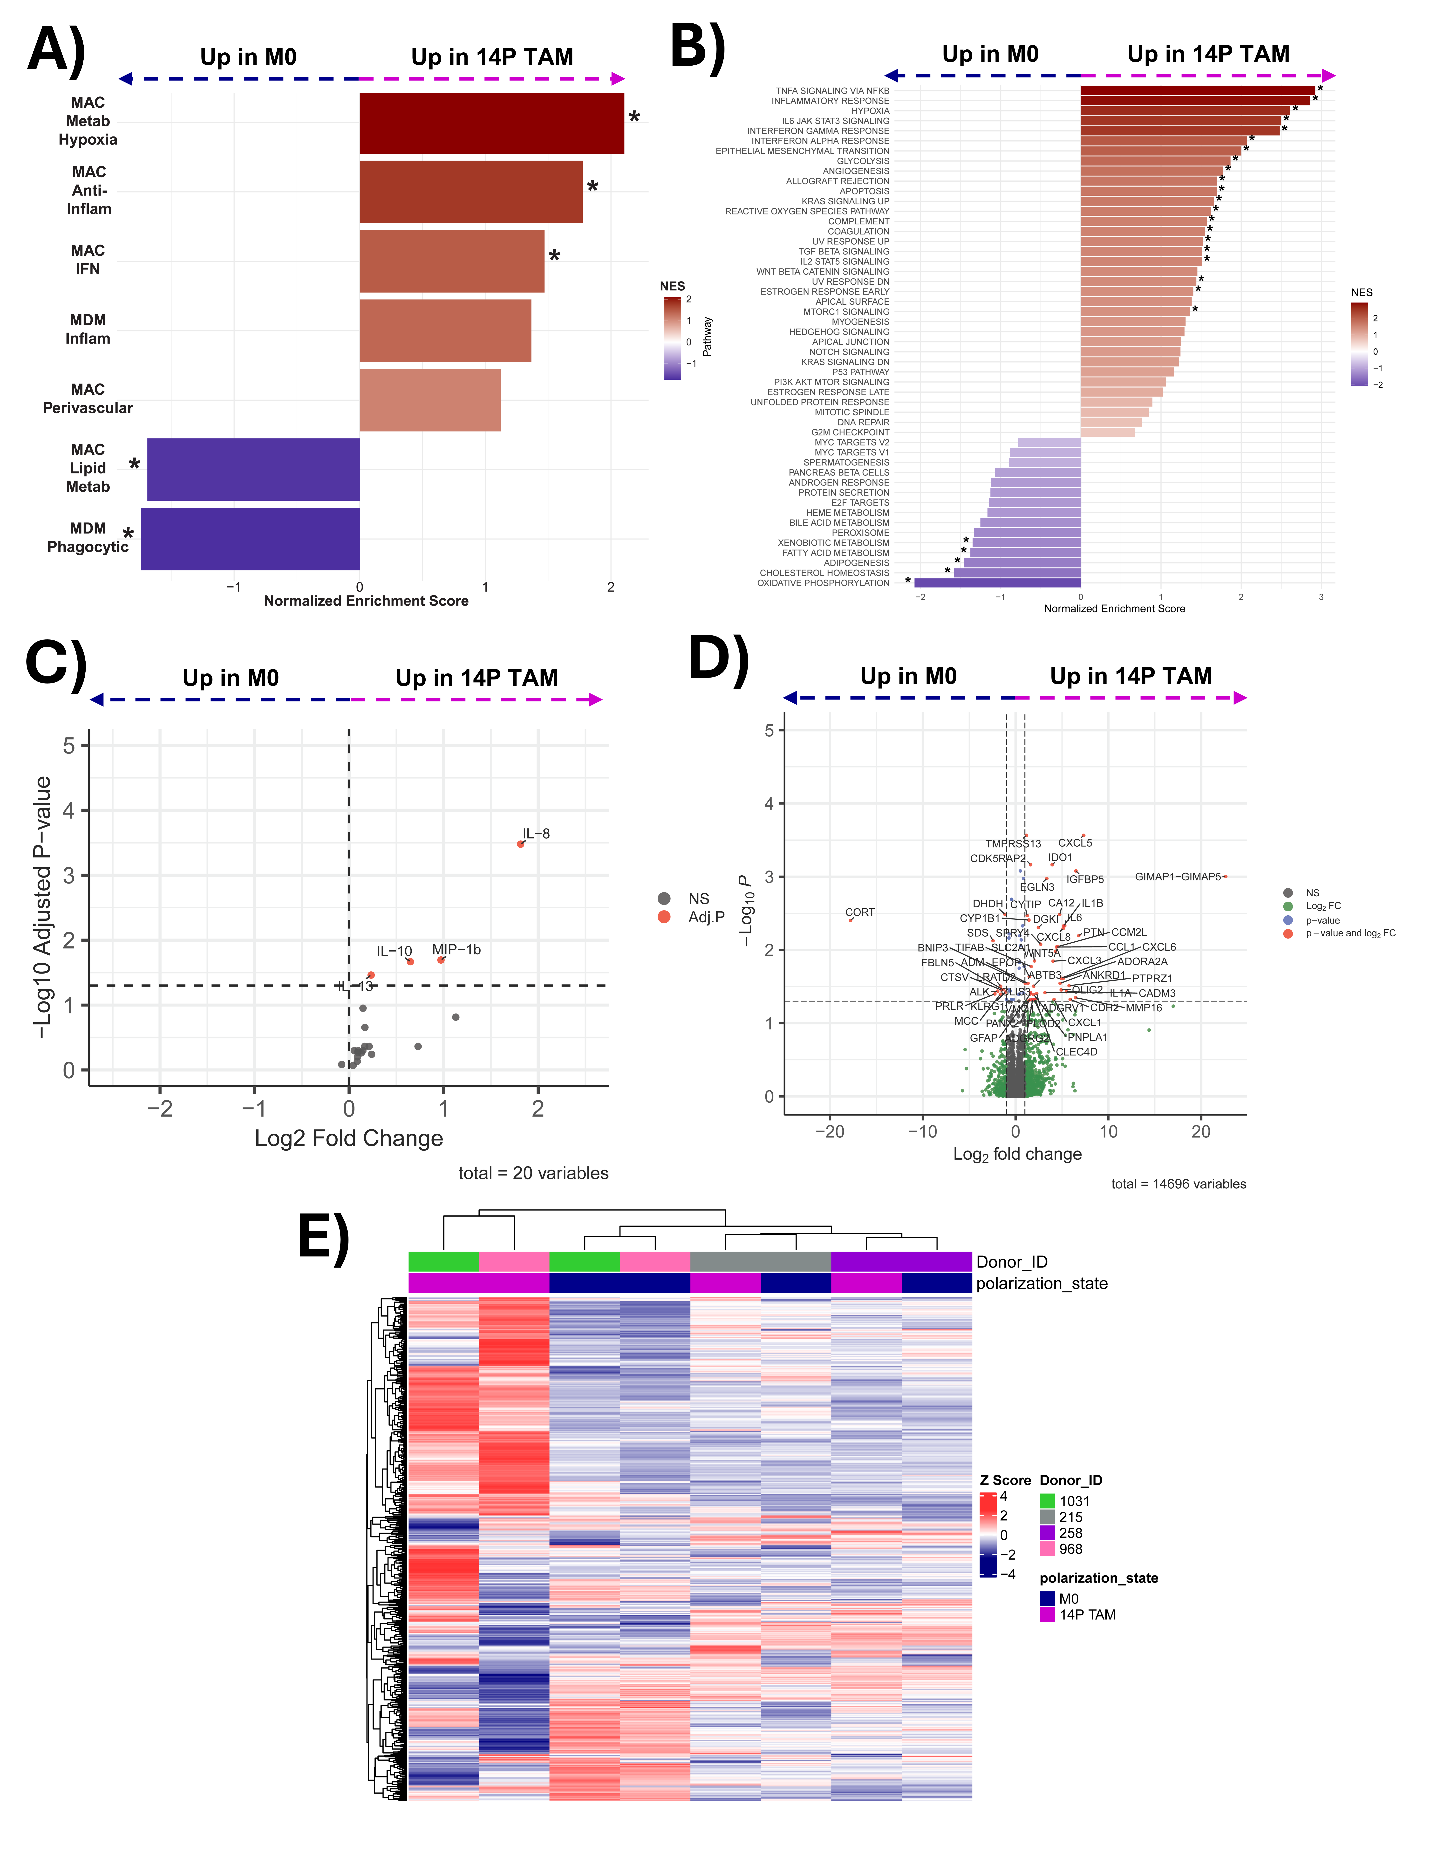


**S Fig. 4: Macrophages polarized by 14P exhibit distinct transcriptomic and cytokine expression profiles from M0 macrophages. (A)** Pairwise plot of GSEA enrichment scores of 14P TAMs relative to M0 macrophages for the macrophage-subset of the GlioTime-36 matrix. **(B)** Pairwise plot of GSEA enrichment scores of 14P TAMs relative to M0 macrophages for the hallmark gene sets.* indicates *P*<0.05 in **A**) and **B**). **(C)** Volcano plot visualization of differentially secreted cytokines between 14P TAMs and M0 macrophages. **(D)** Volcano plot visualization of differentially expressed genes between 14P TAMs and M0 macrophages. **(E)** Unsupervised heatmap of the top 500 variable genes for macrophages polarized to 14P TAM and M0 states**.**

**
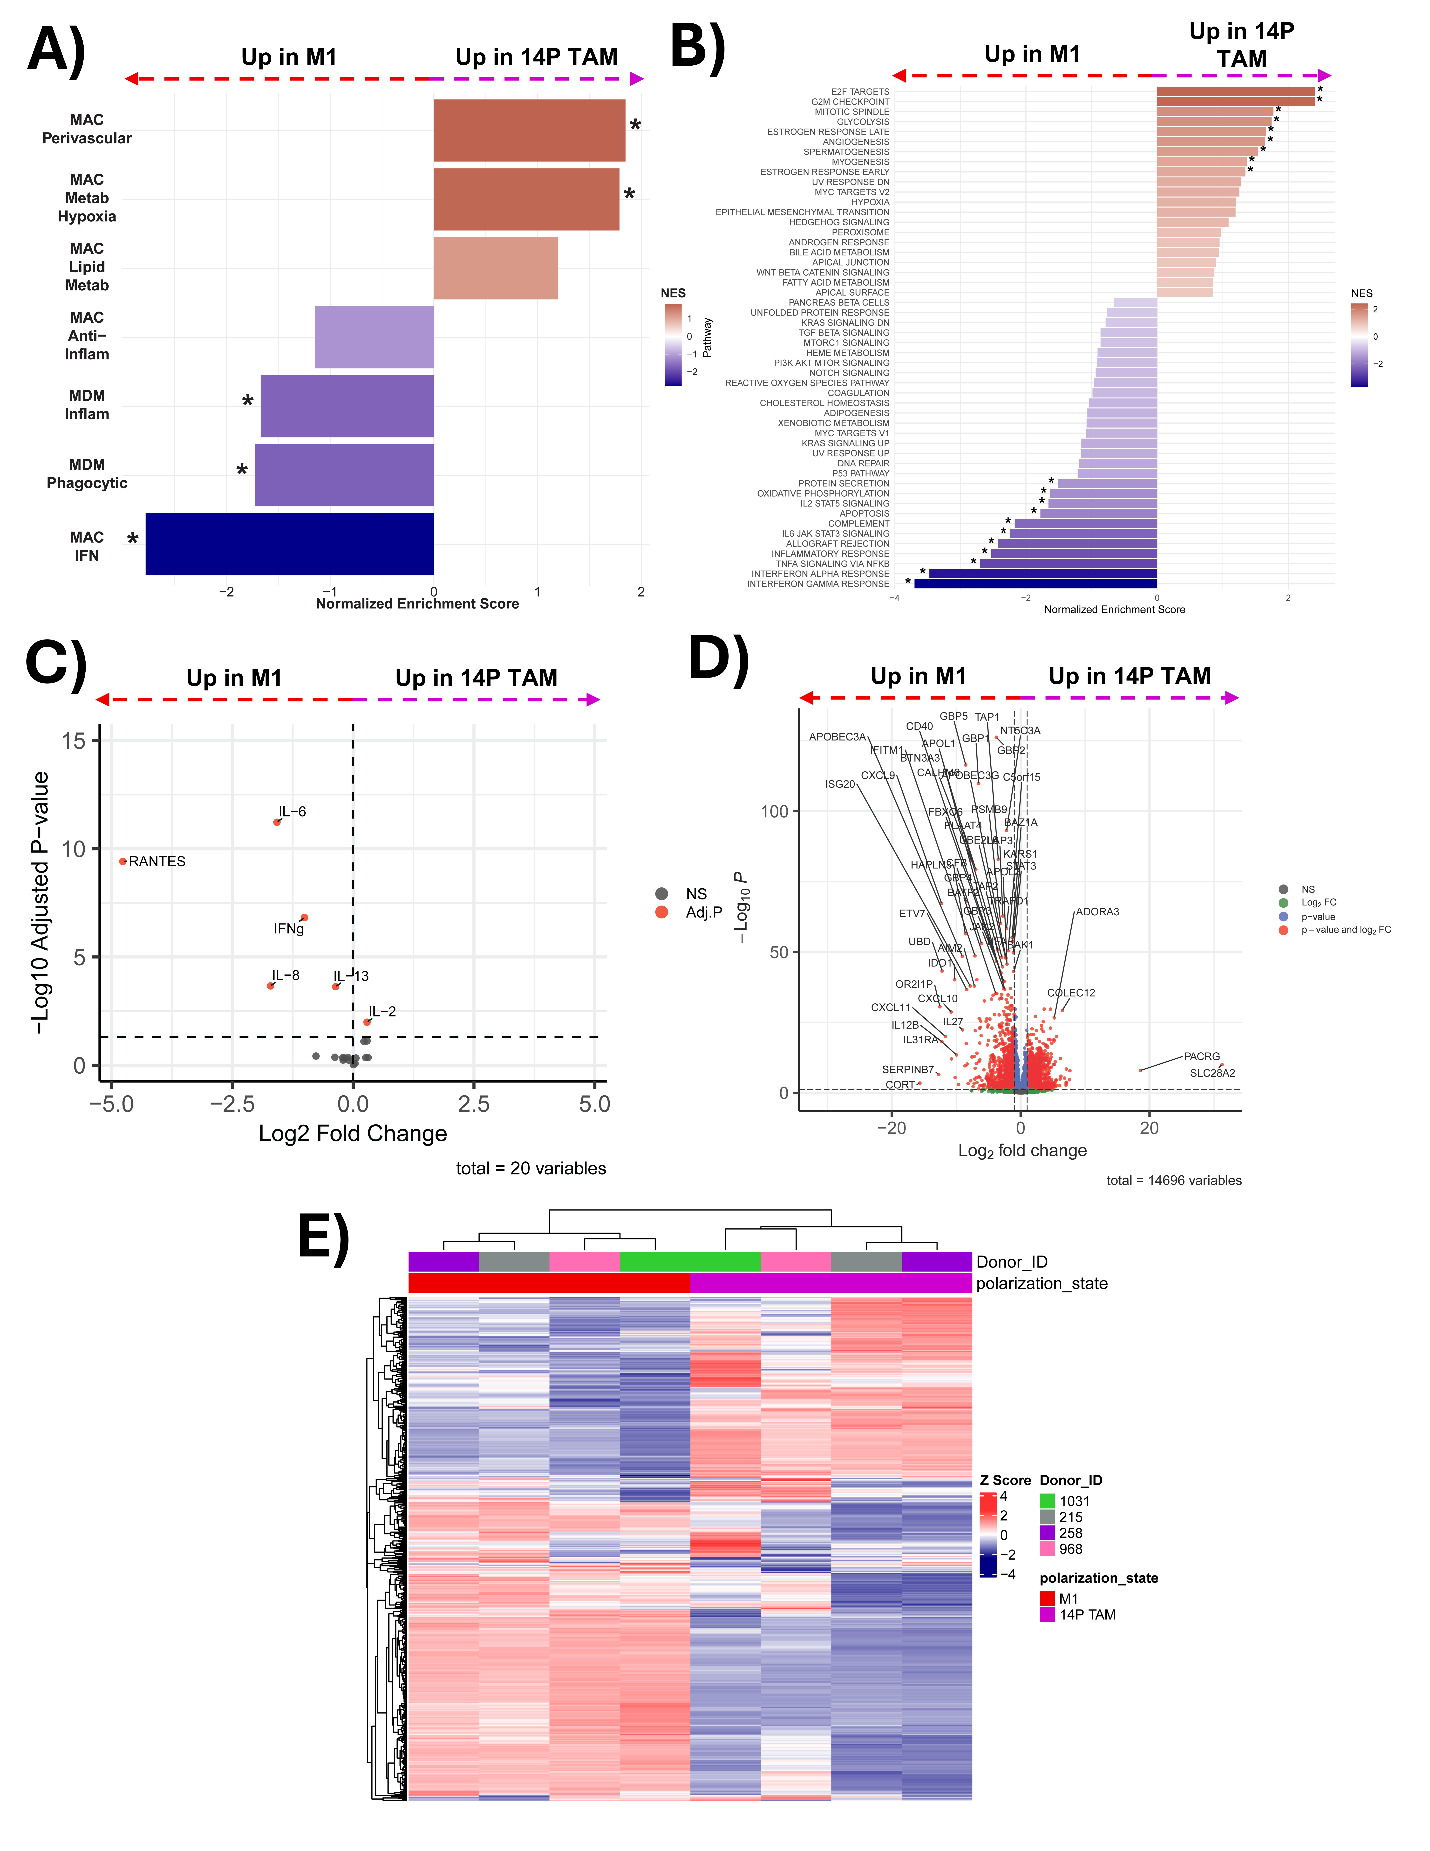
**

**S Fig. 5: Macrophages polarized by 14P exhibit distinct transcriptomic and cytokine expression profiles from M1 macrophages. (A)** Pairwise plot of GSEA enrichment scores of 14P TAMs relative to M1 macrophages for the macrophage-subset of the GlioTime-36 matrix. **(B)** Pairwise plot of GSEA enrichment scores of 14P TAMs relative to M1 macrophages for the hallmark gene sets. * indicates *P*<0.05 in **A**) and **B**). **(C)** Volcano plot visualization of differentially secreted cytokines between 14P TAMs and M1 macrophages. **(D)** Volcano plot visualization of differentially expressed genes between 14P TAMs and M1 macrophages. **(E)** Unsupervised heatmap of the top 500 variable genes for macrophages polarized to 14P TAM and M1 states**.**

**
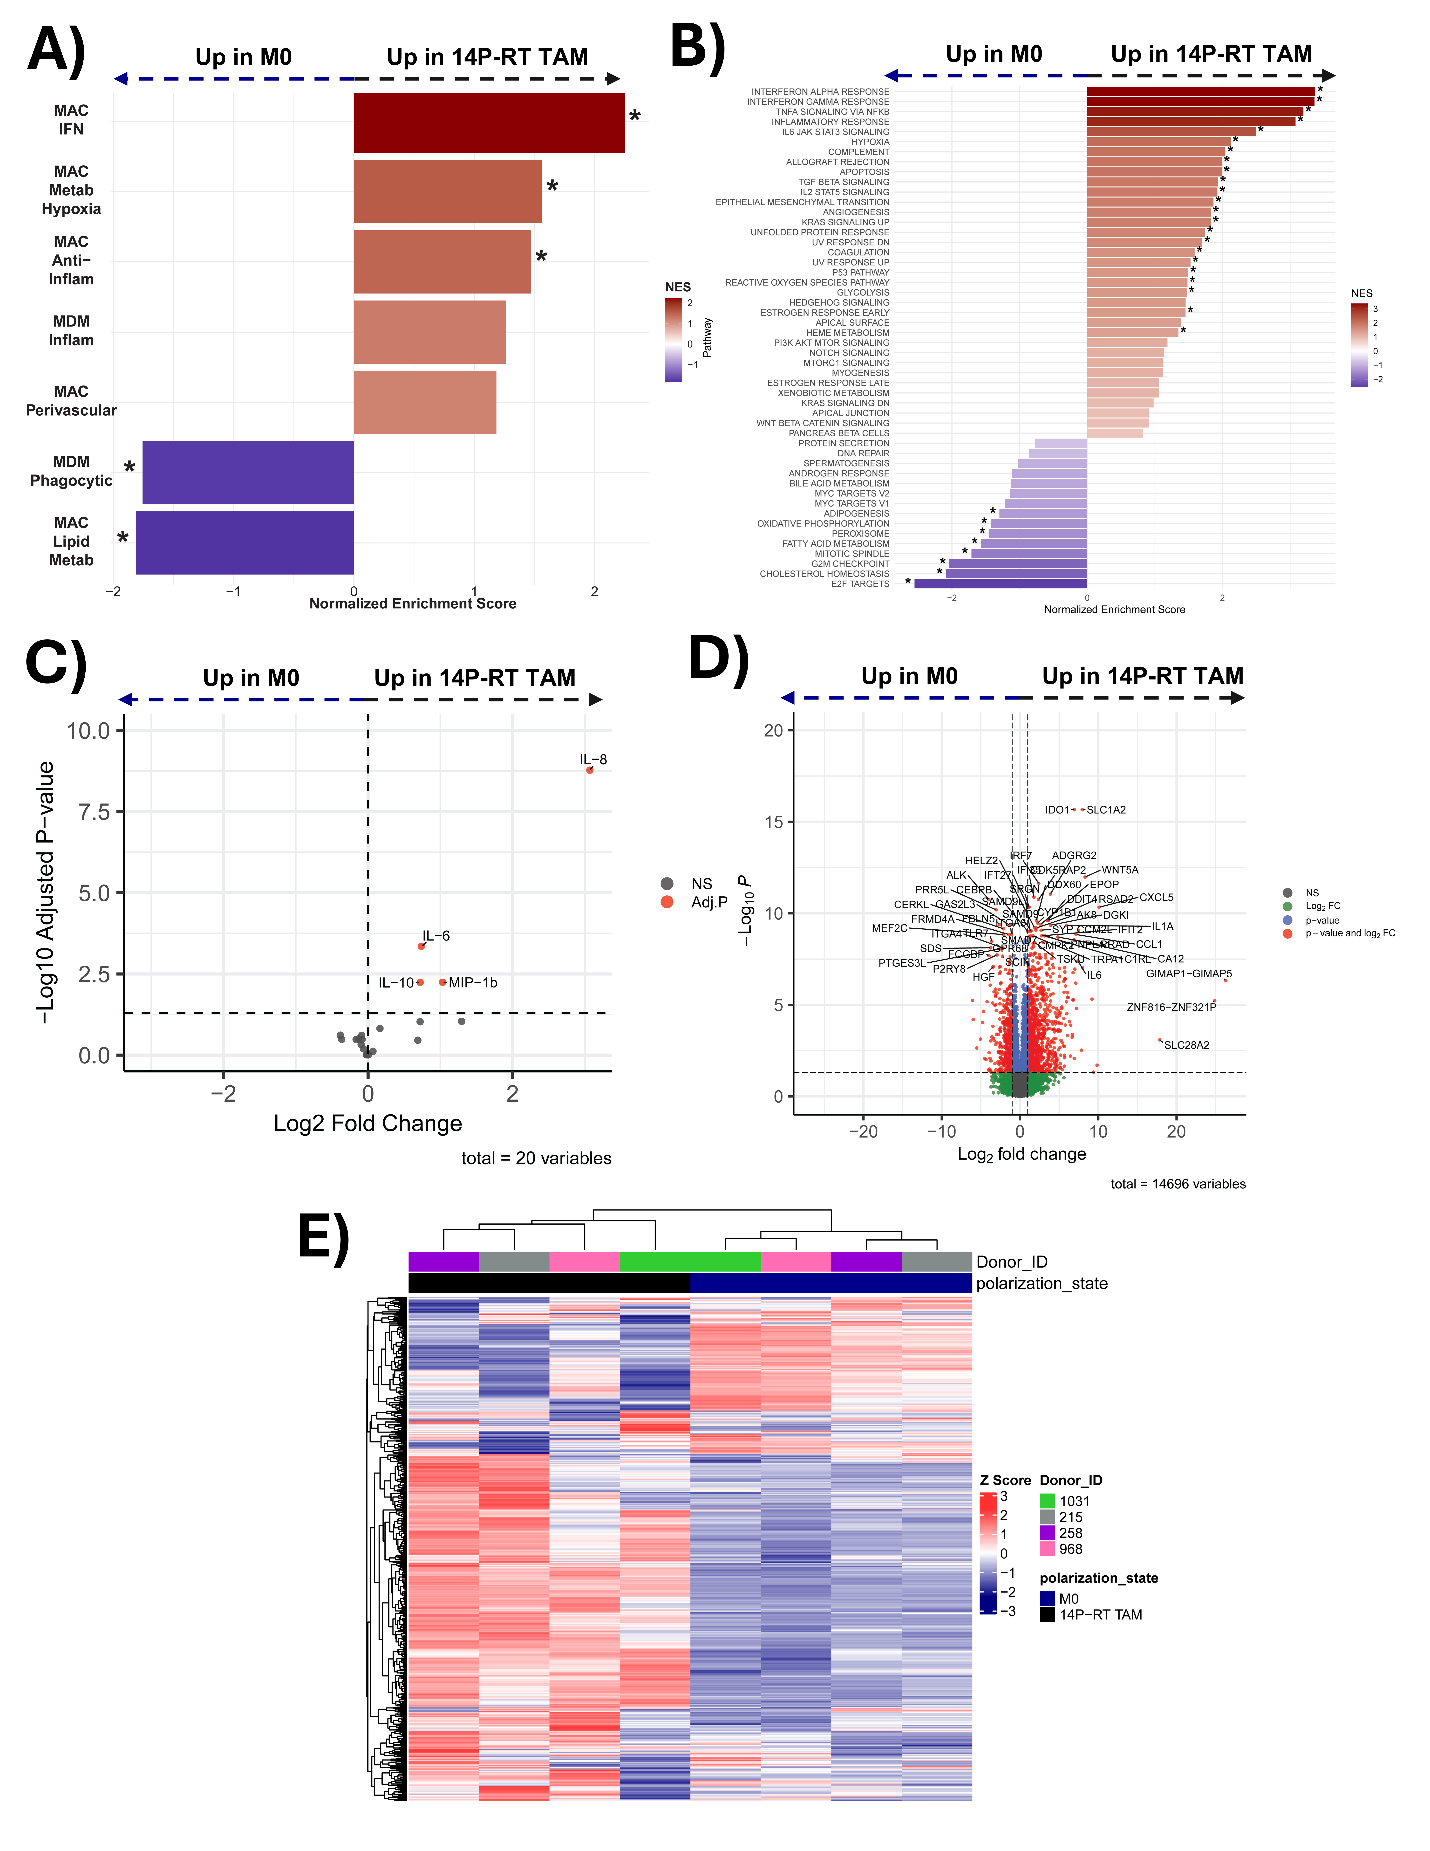
**

**S Fig. 6: Macrophages polarized by 14P-RT exhibit distinct transcriptomic and cytokine expression profiles from M0 macrophages. (A)** Pairwise plot of GSEA enrichment scores of 14P-RT TAMs relative to M0 macrophages for the macrophage-subset of the GlioTime-36 matrix. **(B)** Pairwise plot of GSEA enrichment scores of 14P-RT TAMs relative to M0 macrophages for the hallmark gene sets. * indicates *P*<0.05 in **A**) and **B**). **(C)** Volcano plot visualization of differentially secreted cytokines between 14P-RT TAMs and M0 macrophages. **(D)** Volcano plot visualization of differentially expressed genes between 14P-RT TAMs and M0 macrophages. **(E)** Unsupervised heatmap of the top 500 variable genes for macrophages polarized to 14P-RT TAM and M0 states**.**

**
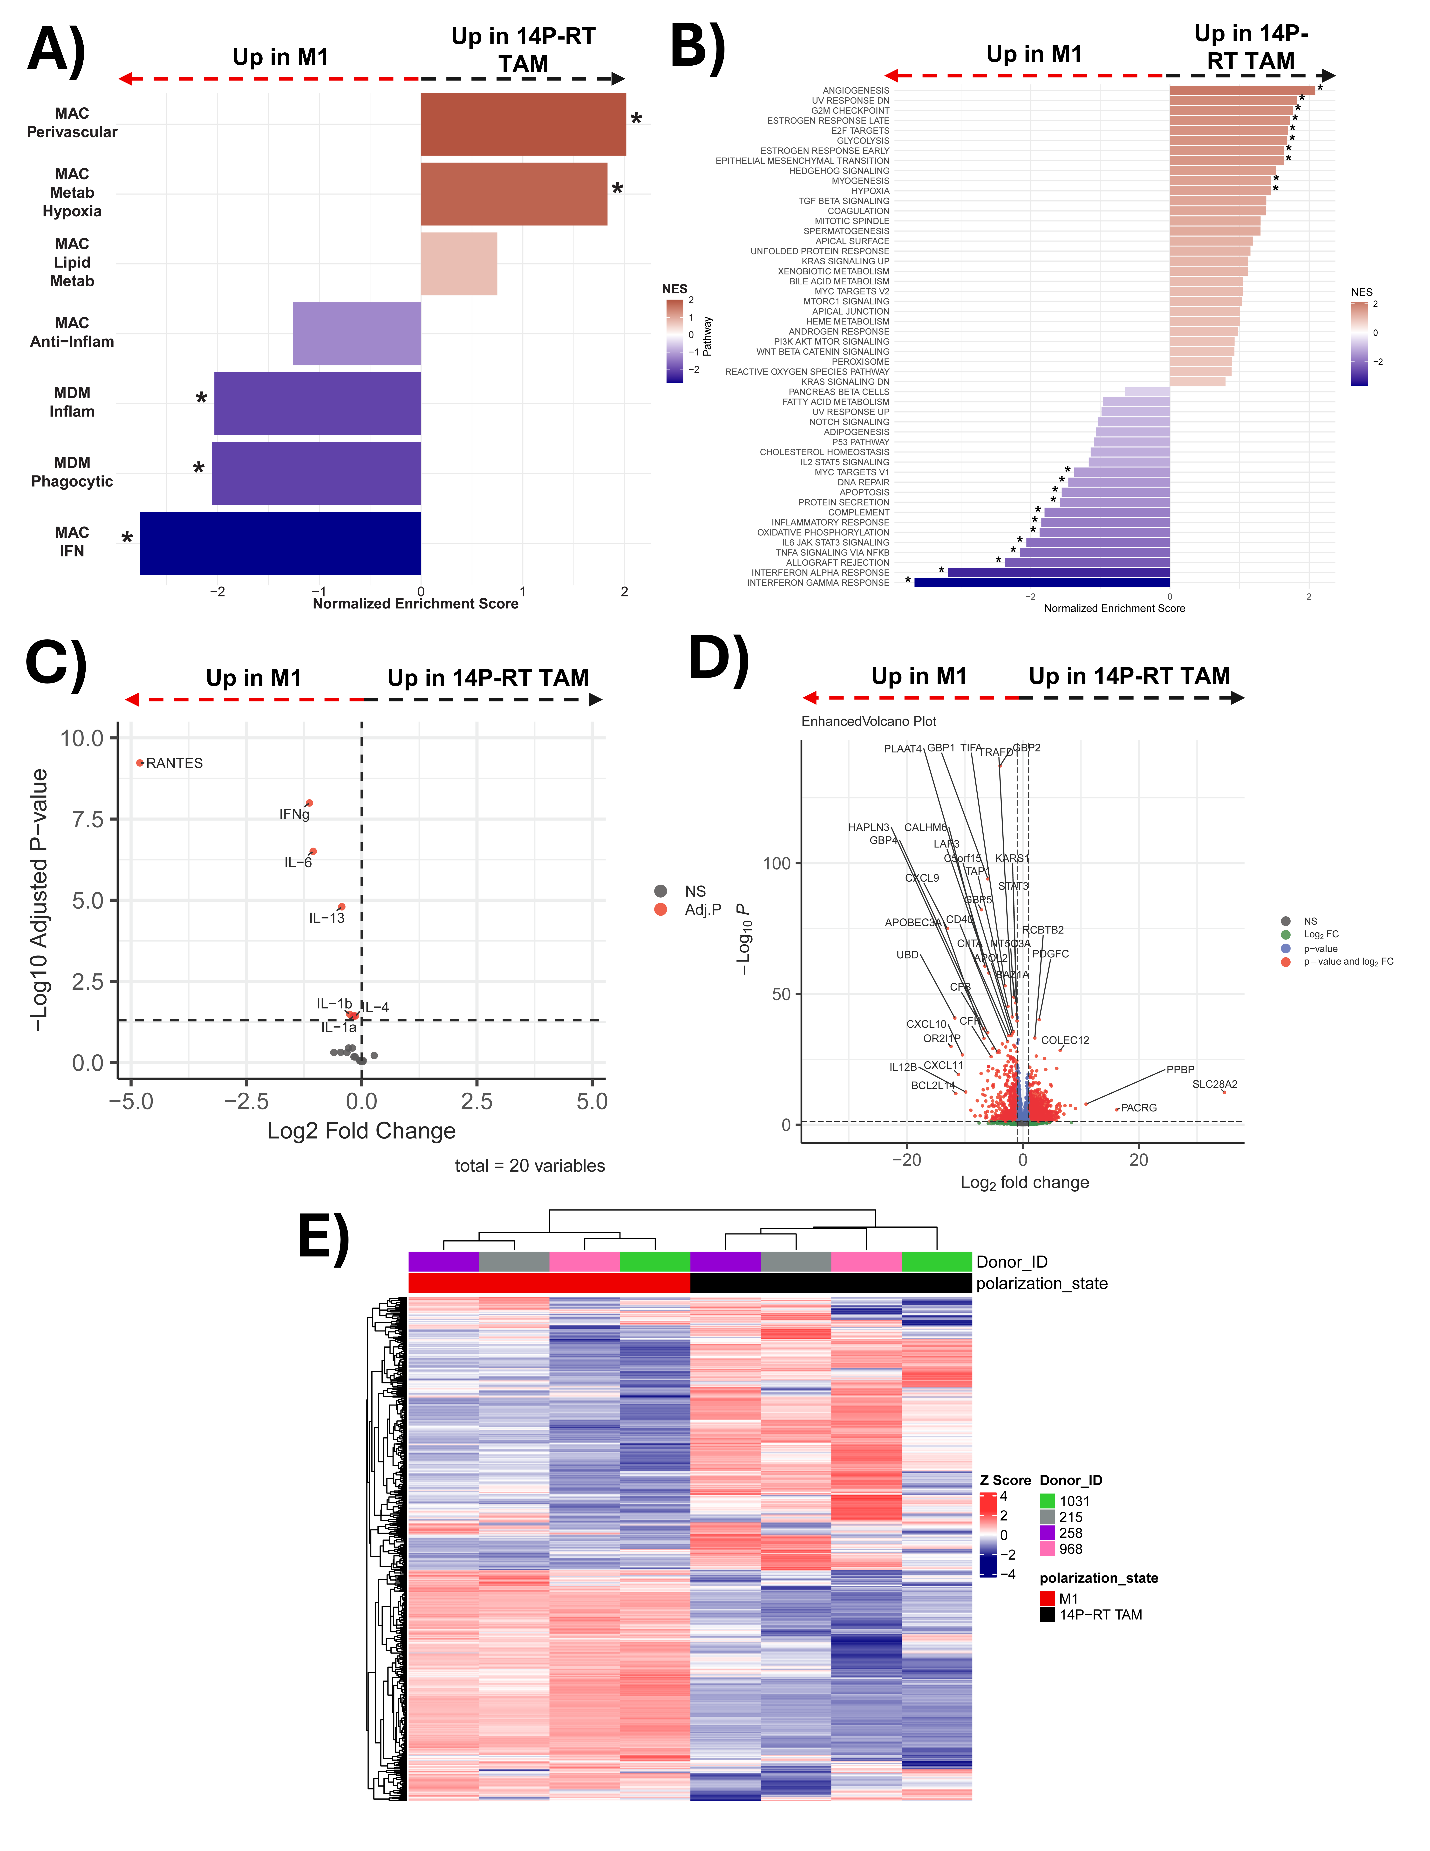
**

**S Fig. 7: Macrophages polarized by 14P-RT exhibit distinct transcriptomic and cytokine expression profiles from M1 macrophages. (A)** Pairwise plot of GSEA enrichment scores of 14P-RT TAMs relative to M1 macrophages for the macrophage-subset of the GlioTime-36 matrix. **(B)** Pairwise plot of GSEA enrichment scores of 14P-RT TAMs relative to M1 macrophages for the hallmark gene sets. * indicates *P*<0.05 in **A**) and **B**). **(C)** Volcano plot visualization of differentially secreted cytokines between 14P-RT TAMs and M1 macrophages. **(D)** Volcano plot visualization of differentially expressed genes between 14P-RT TAMs and M1 macrophages. **(E)** Unsupervised heatmap of the top 500 variable genes for macrophages polarized to 14P-RT TAM and M1 states**.**
